# Supplementary material for: Structural insight into the methyltransfer mechanism of the bifunctional Trm5
Source: PubMed Central journal article supplement — Sci Adv. 2017 Dec 1;3(12):e1700195. doi: 10.1126/sciadv.1700195 (PMC5714064; doi:10.1126/sciadv.1700195), 2017-12-01
Supplement: 1700195_SM.pdf [file 1700195_SM.pdf]

## Supplementary Materials for **Structural insight into the methyltransfer mechanism of the bifunctional Trm5**

Caiyan Wang, Qian Jia, Jianhua Zeng, Ran Chen, Wei Xie

Published 1 December 2017, *Sci. Adv.* **3**, e1700195 (2017)

DOI: 10.1126/sciadv.1700195

### **This PDF file includes:**

- fig. S1. Biosynthesis of wyosine derivatives in eukaryotic tRNA<sup>Phe</sup>.
- fig. S2. The overall structure of the PaTrm5a-tRNA<sup>Phe</sup>-SAH ternary complex.
- fig. S3. The asymmetric unit contents in the cocrystals of the PaTrm5a-tRNA<sup>Phe</sup>-SAH ternary complex.
- fig. S4. The multiple sequence alignment of Trm5 sequences from different model organisms.
- fig. S5. The interaction mode of U33/G34 in the PaTrm5a-tRNA<sup>Phe</sup>-SAH ternary complex.
- fig. S6. Purity test of tRNA truncation mutants by size exclusion chromatography and Urea-PAGE.
- table S1. Specific interactions between the enzyme and the tRNA substrate.
- table S2. Statistics on SAXS data collection, analysis, and modeling.

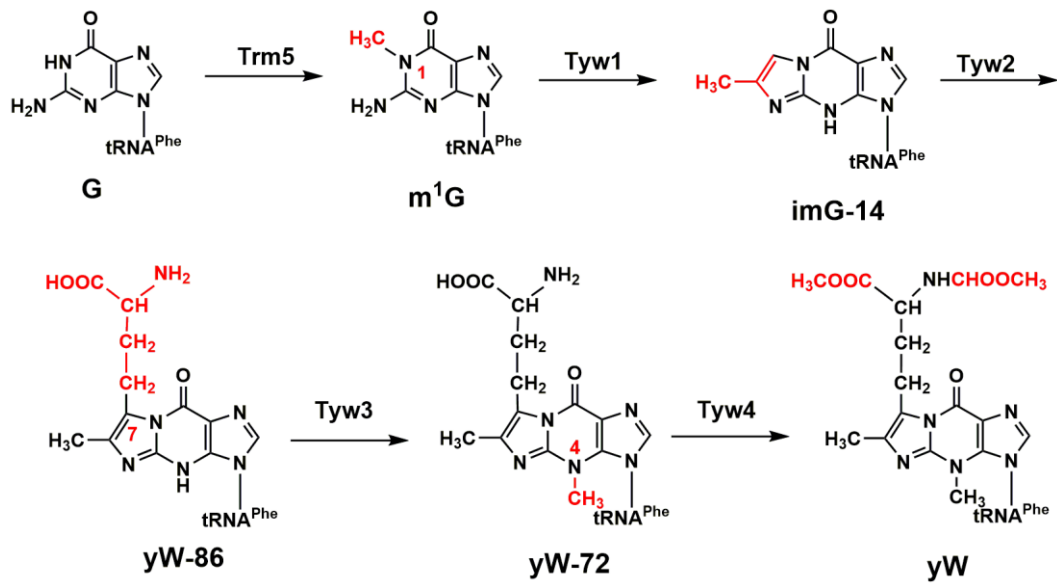

fig. S1. Biosynthesis of wyosine derivatives in eukaryotic tRNA<sup>Phe</sup>s.

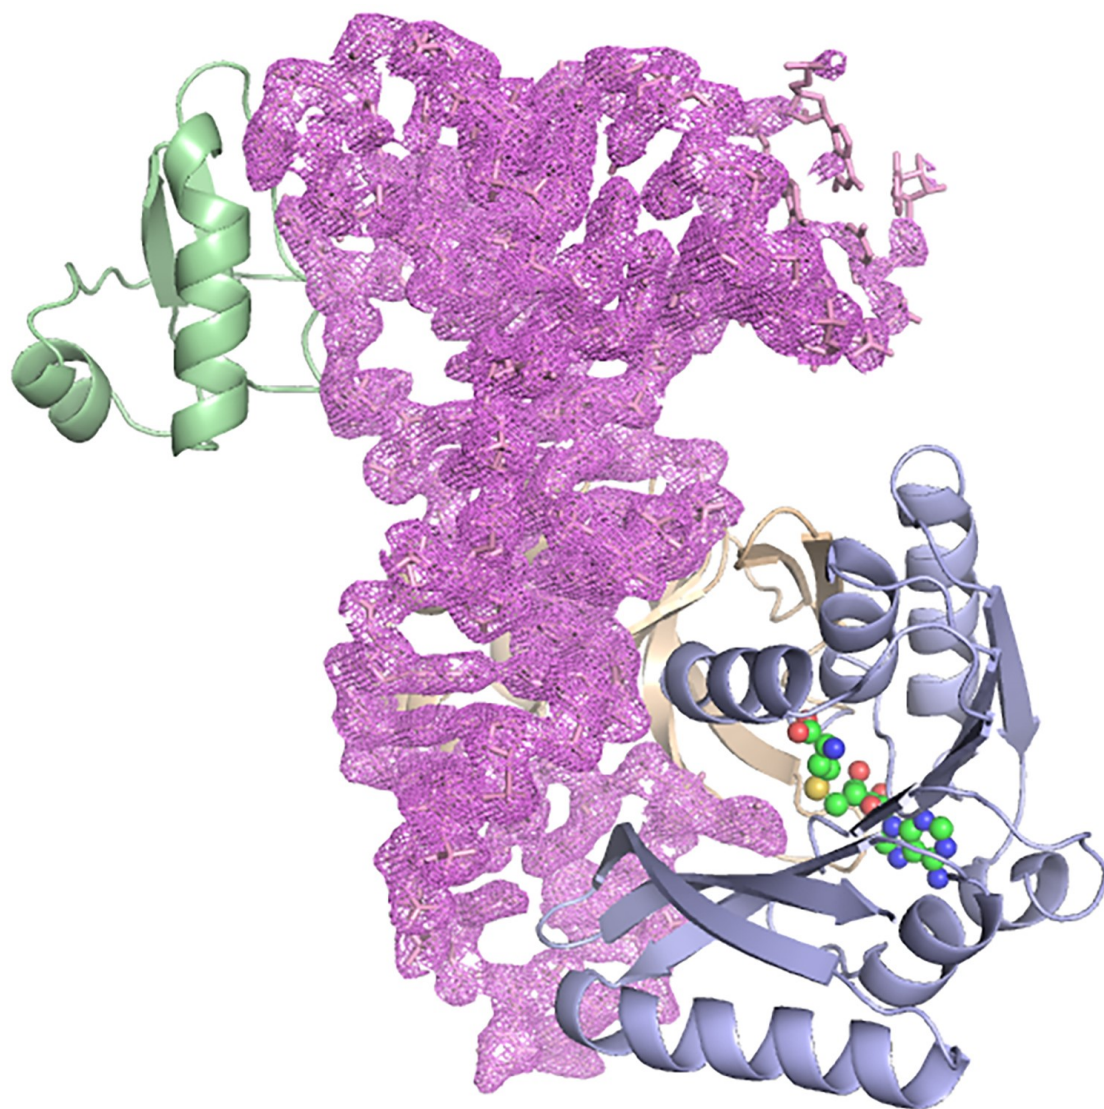

**fig. S2.** The overall structure of the PaTrm5a-tRNA<sup>Phe</sup>-SAH ternary complex. The coloring scheme is as in Fig. 1A and the 2Fo-Fc map for tRNA is contoured at  $1\sigma$ .

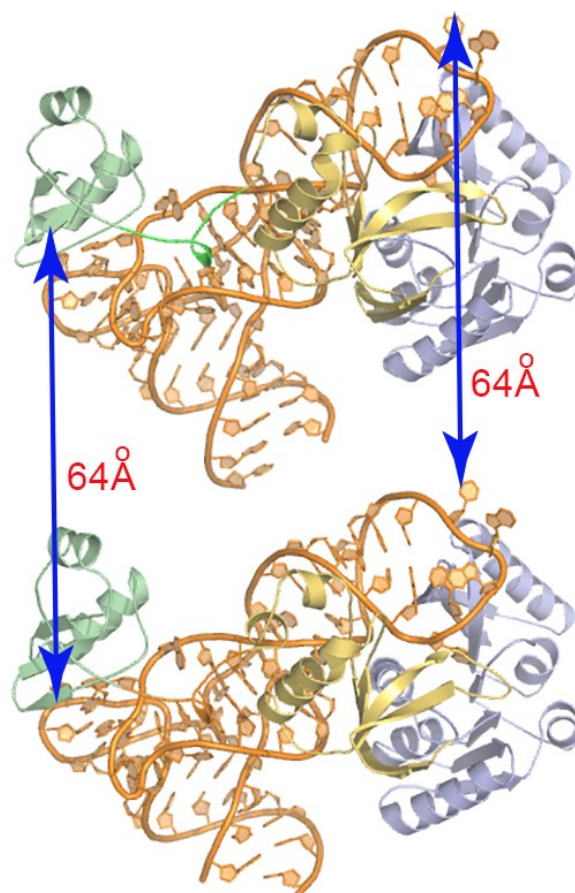

**fig. S3. The asymmetric unit contents in the cocrystals of the PaTrm5a-tRNA<sup>Phe</sup>-SAH ternary complex.**



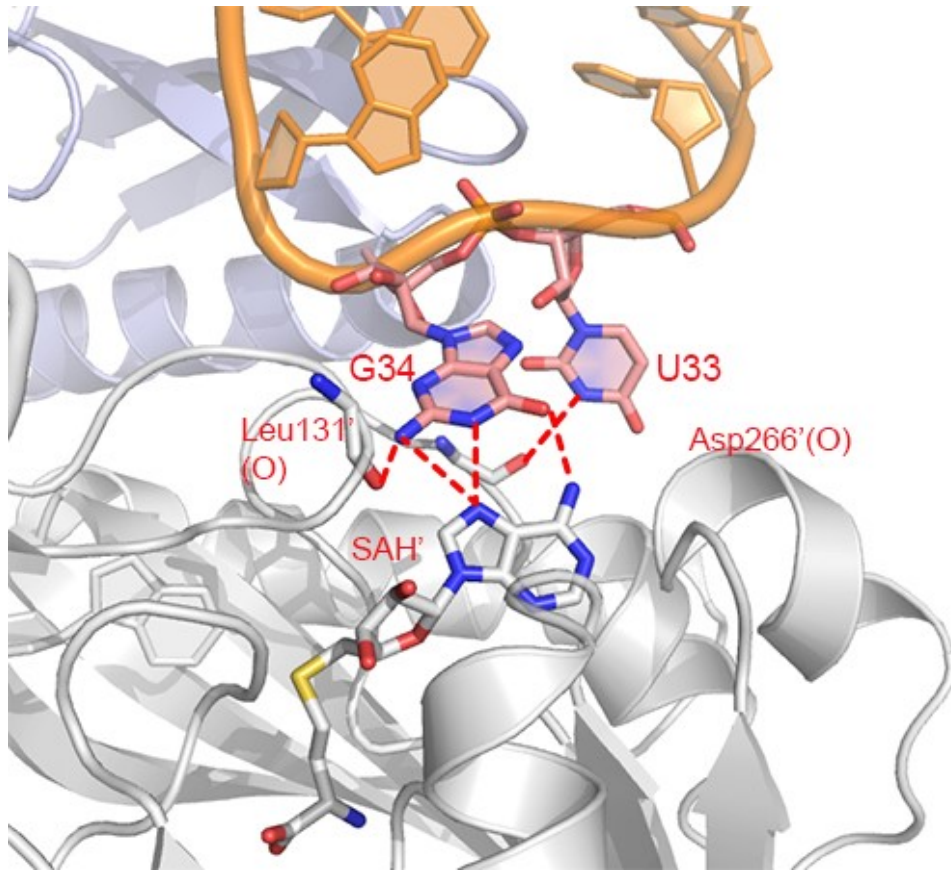

**fig. S5. The interaction mode of U33/G34 in the PaTrm5a-tRNA<sup>Phe</sup>-SAH ternary complex.** Note that the gray color and primes indicate residues/domains from a symmetry mate.

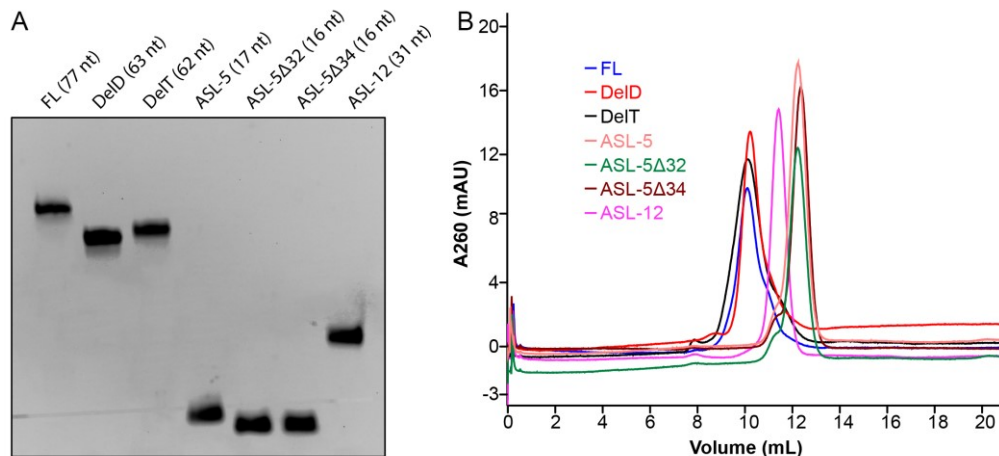

**fig. S6. Purity test of tRNA truncation mutants by size exclusion chromatography and Urea-PAGE.** (A) Purity test of the tRNA truncation mutants by Urea-PAGE. (B) The overlaid FPLC traces of the FL, DelD, DelT, ASL-5, ASL-5-Δ32, ASL-5-Δ34 and ASL-12 RNA variants from a Superdex 75 column.

**table S1. Specific interactions between the enzyme and the tRNA substrate.** We consider distances between functional groups involved in hydrogen-bonding interactions  $<3.6 \text{ \AA}$ .

| PatRNA <sup>Phe</sup> |     | PaTrm5a |     | Distance |
|-----------------------|-----|---------|-----|----------|
| resid                 | ato | resid   | ato |          |
| C11                   | O2  | Lys1    | NZ  | 2.97     |
| C11                   | O3' | Asn1    | N   | 3.03     |
| C11                   | O2' | Asn1    | N   | 3.31     |
| U12                   | OP  | Gly1    | N   | 2.89     |
| C13                   | O3' | Lys1    | NZ  | 3.27     |
| A14                   | OP  | Lys1    | NZ  | 2.60     |
| A14                   | O5' | Lys1    | NZ  | 3.13     |
| G15                   | O3' | Gln6    | NE  | 3.38     |
| C16                   | OP  | Gln6    | NE  | 2.64     |
| G19                   | OP  | Lys2    | NZ  | 3.41     |
| G19                   | O3' | Lys1    | NZ  | 3.57     |
| G19                   | N2  | Lys1    | N   | 3.56     |
| G19                   | O6  | Arg3    | NE  | 3.24     |
| G19                   | N7  | Arg3    | NH  | 2.54     |
| G20                   | OP  | Lys1    | NZ  | 2.54     |
| G20                   | O5' | Lys1    | NZ  | 2.64     |
| G20                   | N2  | Arg6    | NH  | 3.51     |
| G20                   | N1  | Arg6    | NH  | 3.43     |
| G20                   | N2  | Gln6    | O   | 3.58     |
| G20                   | N1  | Gln6    | O   | 2.86     |
| G20                   | O6  | Tyr6    | N   | 2.98     |
| G20                   | N2  | Tyr6    | OH  | 3.31     |
| A23                   | O2' | Tyr1    | OH  | 2.98     |
| A23                   | N3  | Tyr1    | OH  | 2.72     |
| G24                   | O4' | Tyr1    | OH  | 2.93     |
| G24                   | N9  | Tyr1    | OH  | 3.38     |
| G24                   | N2  | Lys1    | NZ  | 3.54     |
| G24                   | O3' | Leu8    | O   | 3.05     |
| G24                   | O2' | Leu8    | O   | 2.88     |
| C25                   | O5' | Arg8    | NH  | 2.70     |
| C25                   | OP  | Arg8    | NH  | 3.04     |
| C25                   | OP  | Arg8    | NE  | 2.54     |
| C25                   | O3' | Arg1    | NE  | 3.53     |
| C25                   | O2' | Lys1    | NZ  | 3.40     |

| PatRNA <sup>Phe</sup> |     | PaTrm5a |     | Distance |
|-----------------------|-----|---------|-----|----------|
| resid                 | ato | resid   | ato |          |
| C25                   | O2  | Lys1    | NZ  | 2.96     |
| A26                   | OP  | Arg8    | NH  | 2.82     |
| A31                   | N6  | Asp3    | OD  | 3.18     |
| C32                   | N3  | His3    | N   | 3.39     |
| C32                   | N4  | Tyr3    | OH  | 3.31     |
| U33                   | OP  | His3    | NE  | 3.18     |
| A35                   | OP  | Lys3    | NZ  | 2.49     |
| A35                   | O5' | Lys3    | NZ  | 3.27     |
| A36                   | OP  | Lys3    | NZ  | 2.73     |
| A36                   | O5' | Tyr3    | OH  | 3.26     |
| A36                   | OP  | Tyr3    | OH  | 2.72     |
| A36                   | O2' | Tyr3    | O   | 2.47     |
| G37                   | OP  | His1    | N   | 3.22     |
| G37                   | O2' | His1    | NE  | 3.06     |
| G37                   | OP  | Arg1    | NH  | 2.89     |
| G37                   | N7  | Arg1    | NH  | 2.75     |
| G37                   | O6  | Arg1    | NE  | 2.54     |
| G37                   | O6  | Lys2    | N   | 3.05     |
| A38                   | OP  | Arg1    | NH  | 3.59     |
| A38                   | OP  | Arg1    | NH  | 3.55     |
| A38                   | O2' | Arg1    | NH  | 3.48     |
| A38                   | O3' | Arg1    | NH  | 3.02     |
| A38                   | N6  | Pro3    | N   | 3.35     |
| A38                   | N9  | Tyr3    | O   | 3.40     |
| A38                   | N7  | Tyr3    | O   | 3.59     |
| A38                   | N7  | Lys3    | N   | 3.43     |
| U39                   | OP  | Arg1    | NH  | 3.48     |
| U39                   | OP  | Arg1    | NH  | 3.37     |
| U39                   | OP  | Arg1    | NH  | 3.16     |
| U39                   | O4  | Asp3    | OD  | 3.40     |
| C40                   | OP  | Leu8    | O   | 3.51     |
| C56                   | N1  | Arg8    | O   | 3.07     |
| C56                   | O2  | Lys1    | N   | 3.21     |
|                       |     |         |     |          |

**table S2. Statistics on SAXS data collection, analysis, and modeling.**

| apo-PaTrm5a                       |                            |               |
|-----------------------------------|----------------------------|---------------|
| <b>Data Collection Parameters</b> |                            |               |
| Instrument                        |                            | SSRF-BL19U2   |
| Beam geometry                     |                            | Slit          |
| Wavelength (Å )                   |                            | 1.033         |
| q range (Å <sup>-1</sup> )        |                            | 0.01-0.45     |
| Exposure time (s)                 |                            | 1.0 per frame |
| Temperature (K)                   |                            | 277           |
| <b>Structural Parameters</b>      |                            |               |
| From Guinier fit                  | $I(0)$ (cm <sup>-1</sup> ) | 16.53 ± 0.029 |
|                                   | $R_g$ (Å )                 | 28.07 ± 2.50  |
| From P(r)                         | $I(0)$ (cm <sup>-1</sup> ) | 16.81 ± 0.042 |
|                                   | $R_g$ (Å )                 | 29.70 ± 0.132 |
|                                   | $D_{max}$ (Å )             | 116.63        |
| <b>Modeling</b>                   |                            |               |
| DAMMIF                            | $\chi^2$                   | 1.017         |
|                                   | NSD                        | 0.716 ± 0.030 |
